# Supplementary material for: Feedback Inhibition of DszC, a Crucial Enzyme for Crude Oil Biodessulfurization
Source: MDPI journal article supplement (doi:10.3390/catal13040736), 2023-04-13
Supplement: s1 [file s1]

Archive with 2 entries (2 files):
- catalysts-2291317-supplementary-publish.pdf
- catalysts-2291317-supplementary-publish.zip
